# Supplementary material for: Comparison of a PfHRP2-based rapid diagnostic test and PCR for malaria in a low prevalence setting in rural southern Zambia: implications for elimination
Source: Springer Nature journal article supplement (doi:10.1186/s12936-015-0544-3), 2015-01-27
Supplement: MOESM4 [file 9760970]

| <b>Year</b>  | <b>Number of samples tested by</b> |            |                   | <b>Positive by at least one test</b> |
|--------------|------------------------------------|------------|-------------------|--------------------------------------|
|              | <b>Microscopy</b>                  | <b>RDT</b> | <b>Nested PCR</b> |                                      |
| 2008         | 317                                | 317        | 276               | 38                                   |
| 2009         | 676                                | 676        | 638               | 18                                   |
| 2010         | 871                                | 871        | 871               | 16                                   |
| 2011         | 740                                | 740        | 740               | 12                                   |
| 2012         | 688                                | 688        | 688               | 3                                    |
| <b>Total</b> | 3292                               | 3292       | 3213              | 87*                                  |

\*Samples positive by at least one of the three tests were used for the q-PCR analysis
